- horn and effects of descending impulses. *J Physiol (Lond)* 188:403-423, 1967
18. deJong RH, Wagman IH: Block of afferent impulses in the dorsal horn of monkey. A possible mechanism of anesthesia. *Exp Neurol* 20:352-358, 1968
  19. deJong RH, Robles R, Morikawa K: Actions of halothane and nitrous oxide on dorsal horn neurons ("the spinal gate"). *ANESTHESIOLOGY* 31:205-212, 1969
  20. deJong RH, Robles R, Heavner JE: Suppression of impulse transmission in the cat's dorsal horn by inhalation anesthetics. *ANESTHESIOLOGY* 32:440-445, 1970
  21. Kitahata LM, Taub A, Sato I: Lamina-specific suppression of dorsal horn unit activity by nitrous oxide and by hyperventilation. *J Pharmacol Exp Ther* 176:101-108, 1971
  22. Conseiller C, Benoist JM, Hammann KF, et al: Effects of ketamine (CI581) on cell responses to cutaneous stimulation in laminae IV and V in the cat's dorsal horn. *Eur J Pharmacol* 18:346-352, 1972
  23. Kitahata LM, Taub A, Kosaka Y: Lamina-specific suppression of dorsal horn unit activity by ketamine hydrochloride. *ANESTHESIOLOGY* 38:4-11, 1973
  24. Kitahata LM, Kosaka Y, Taub A, et al: Lamina-specific suppression of dorsal horn unit activity by morphine sulphate. *Fed Proc* 32:693ABS, 1973
  25. Rexed B: The cytoarchitectonic organization of the spinal cord of the cat. *J Comp Neurol* 96:415-495, 1952
  26. Domino EF: Sites of action of some central nervous system depressants. *Annu Rev Pharmacol* 2:215-350, 1962
  27. Christensen BN, Perl ER: Spinal neurons specifically excited by noxious or thermal stimuli: Marginal zone of the dorsal horn. *J Neurophysiol* 33:293-307, 1970
  28. Hillman P, Wall PD: Inhibitory and excitatory factors influencing the receptive fields of lamina 5 spinal cord cells. *Exp Brain Res* 9:284-306, 1969
  29. Pomeranz B, Wall PD, Weber WV: Cord cells responding to fine myelinated afferents from viscera, muscle and skin. *J Physiol (Lond)* 199:511-532, 1968
  30. Kitahata LM, McAllister RG, Taub A: Identification of central trigeminal nociceptors and the effects of nitrous oxide. *ANESTHESIOLOGY* 38:12-19, 1973
  31. Taub A, Hoffer M, Kitahata LM: Statistical analysis of dorsal horn unit activity and its response to nitrous oxide. *ANESTHESIOLOGY* 40:24-31, 1974
  32. Besson JM, Wyon-Maillard MC, Benoist JM, et al: Effects of phenoperidine on lamina V cells in the cat dorsal horn. *J Pharmacol Exp Ther* 187:239-245, 1973

## Neonatology

**FETAL LUNG MATURITY** Amniotic fluid total phospholipid phosphorus (TPP) levels are quicker and easier to measure than quantitative lecithin phosphorus (Lec. P) levels for assessing fetal maturity. Between 30 weeks gestation and term, there is a eightfold increase in TPP and a tenfold increase in Lec. P. At delivery a high correlation is found between simultaneous measurements of TPP and Lec. P. Low levels of either TPP or Lec. P are associated with an increased risk of associated RDS. TPP levels greater than 0.14 mg/100 ml are recommended as evidence of fetal pulmonary maturity. (Nelson, G.H.: *Determination of Amniotic Fluid Total Phospholipid Phosphorus as a Test for Fetal Lung Maturity. Am J Obstet Gynecol* 115: 933-941, 1973.)
